# Supplementary material for: Effect of Elevated Temperature Annealing on Nafion/SiO2 Composite Membranes for the All-Vanadium Redox Flow Battery
Source: PubMed Central journal article supplement (PMC6415359; doi:10.3390/polym10050473), 2018-04-26

Supplementary Materials

# Effect of Elevated Temperature Annealing on Nafion/SiO<sub>2</sub> Composite Membranes for the All-Vanadium Redox Flow Battery

Sixiu Zeng, Liuli Zeng, Rui Wang, Wei Guo \* and Haolin Tang \*

State Key Laboratory of Advanced Technology for Materials Synthesis and Processing, Wuhan University of Technology, Wuhan 430070, China

\* Correspondence: guowei2016@whut.edu.cn (W.G.); thln@whut.edu.cn (H.T.)

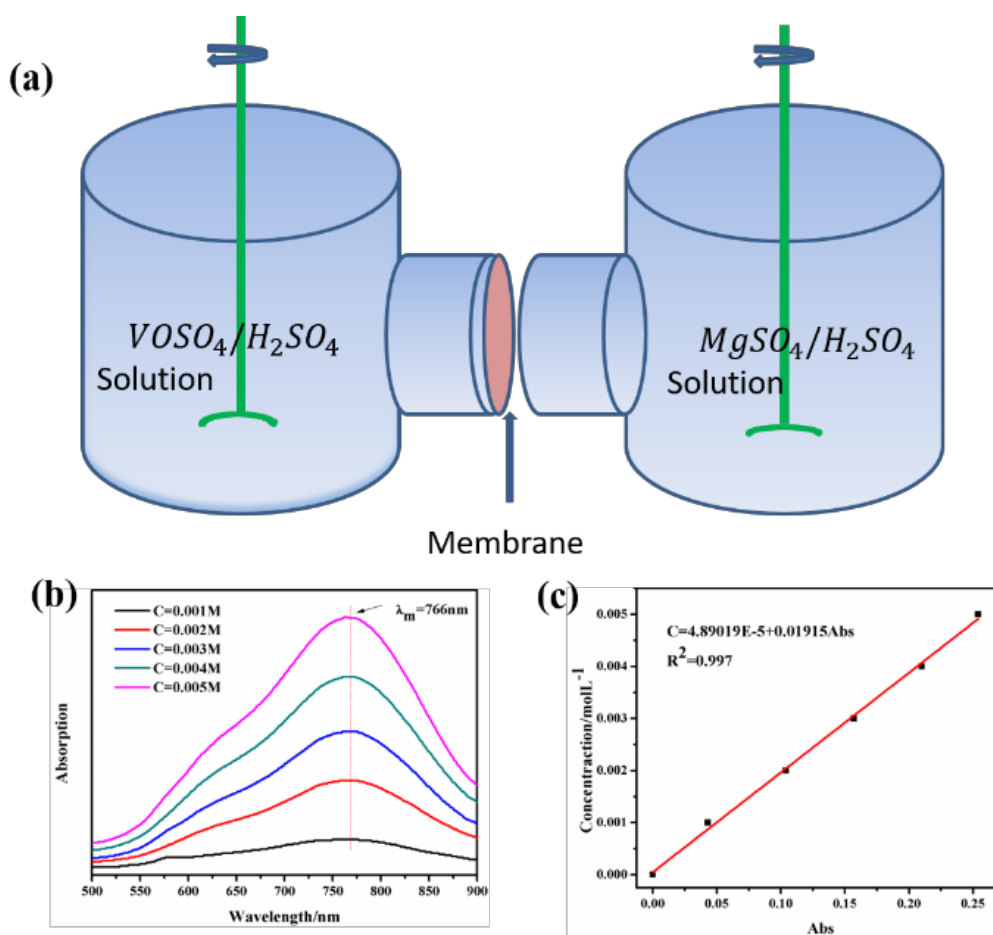

**Figure S1.** (a) Schematic diagram of the diffusion cell used to measure the  $VO^{2+}$  crossover; (b) sorption spectra of the  $VOSO_4$  solution for four different concentrations at  $\lambda_{max} = 766\text{ nm}$ ; and (c) the calibration curve of the  $VOSO_4$  solution with the concentration range between 0.001 M and 0.005 M.

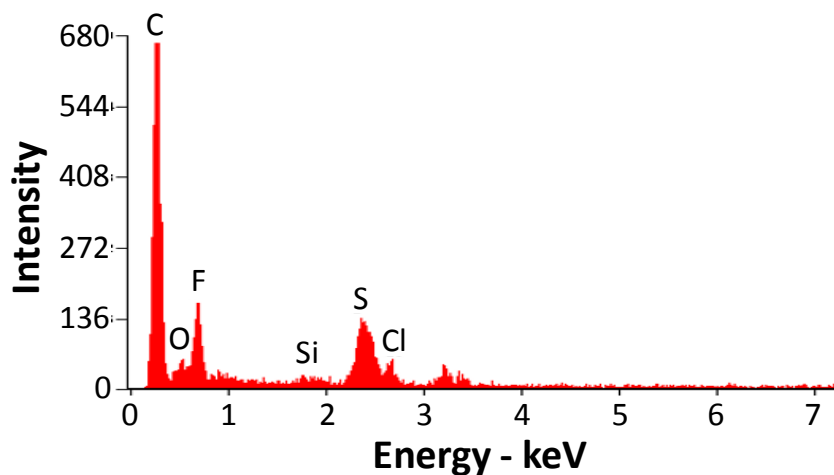

Figure S2. EDX data of the 5%@Nafion/SiO<sub>2</sub>@270 °C sample.

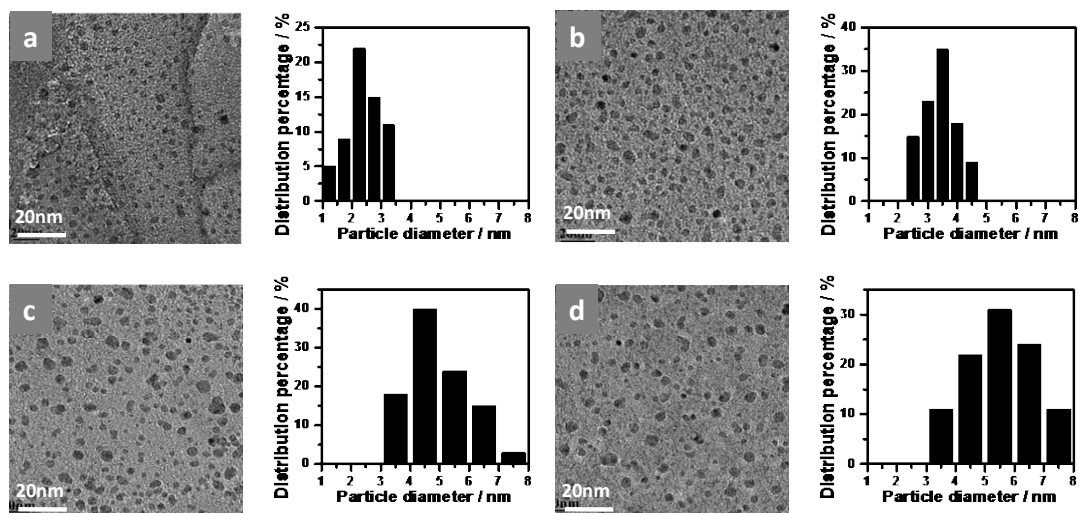

Figure S3. TEM micrographs and particle diameter distribution of 3%@Nafion/SiO<sub>2</sub>@270 °C (a); 5%@Nafion/SiO<sub>2</sub>@270 °C (b); 10%@Nafion/SiO<sub>2</sub>@270 °C (c); and 15%@Nafion/SiO<sub>2</sub>@270 °C (d) samples.

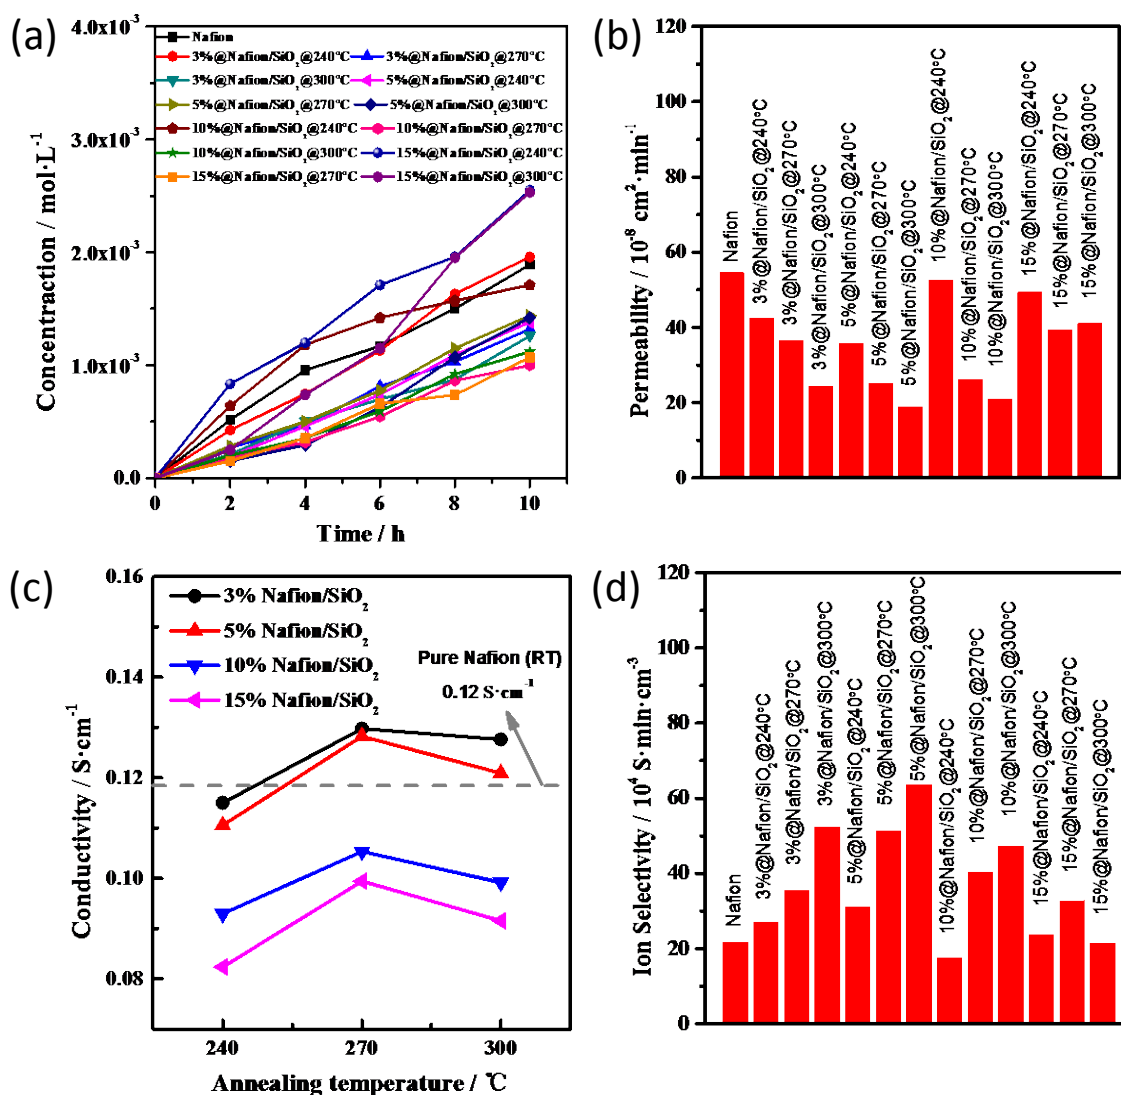

**Figure S4.** Comparison of the time-dependent vanadium ion concentrations (a), permeability (b), proton conductivities (c), and ion selectivity (d) of 3%@Nafion/SiO<sub>2</sub>@240 °C, 3%@Nafion/SiO<sub>2</sub>@270 °C, 3%@Nafion/SiO<sub>2</sub>@300 °C, 5%@Nafion/SiO<sub>2</sub>@240 °C, 5%@Nafion/SiO<sub>2</sub>@270 °C, 5%@Nafion/SiO<sub>2</sub>@300 °C, 10%@Nafion/SiO<sub>2</sub>@240 °C, 10%@Nafion/SiO<sub>2</sub>@270 °C, 10%@Nafion/SiO<sub>2</sub>@300 °C, 15%@Nafion/SiO<sub>2</sub>@240 °C, 15%@Nafion/SiO<sub>2</sub>@270 °C, 15%@Nafion/SiO<sub>2</sub>@300 °C, and pure Nafion samples.

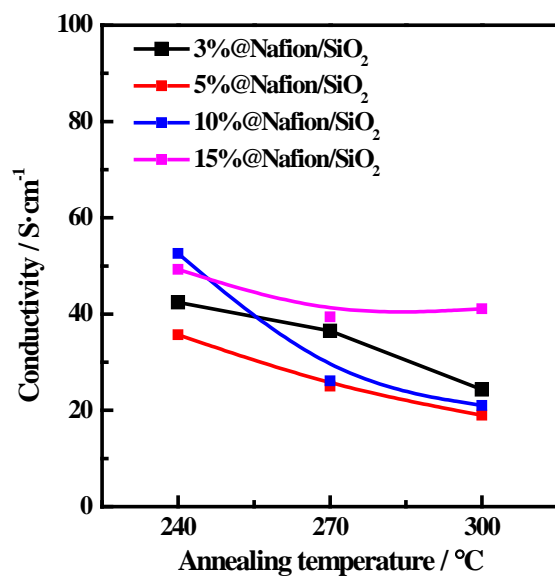

**Figure S5.** The ratio of proton conductivity and temperature of 3%@Nafion/SiO<sub>2</sub>, 5%@Nafion/SiO<sub>2</sub>, 10%@Nafion/SiO<sub>2</sub>, and 15%@Nafion/SiO<sub>2</sub> samples.

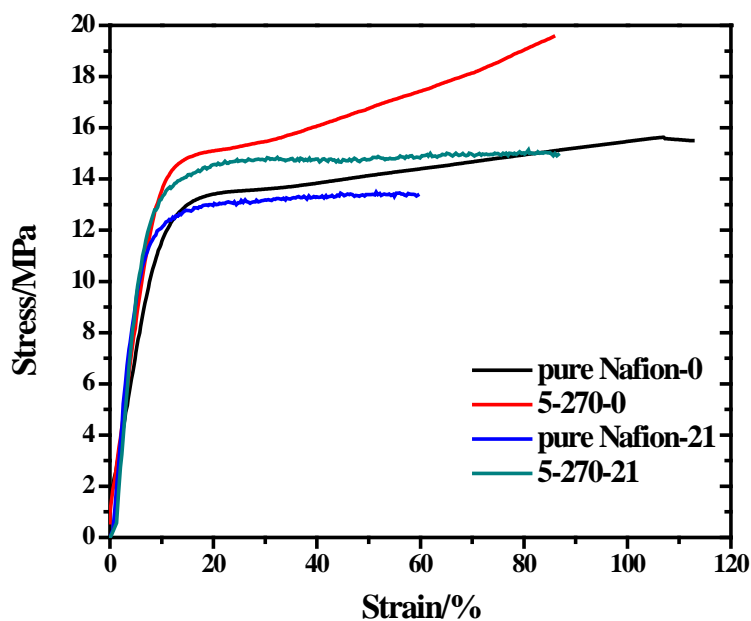

**Figure S6.** The stress-strain behavior for pure Nafion and 5%@Nafion/SiO<sub>2</sub>@270 °C samples before and after 21 days of immersion in V<sup>5+</sup> solution.

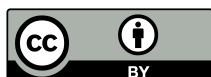

Supplement: polymers-10-00473-s001.pdf [file polymers-10-00473-s001.pdf]
